# Supplementary material for: Deciphering the Stromal and Hematopoietic Cell Network of the Adventitia from Non-Aneurysmal and Aneurysmal Human Aorta
Source: PubMed Central journal article supplement (PMC3937418; doi:10.1371/journal.pone.0089983), 2014-02-27
Supplement: pone.0089983.s001.pdf [file pone.0089983.s001.pdf]

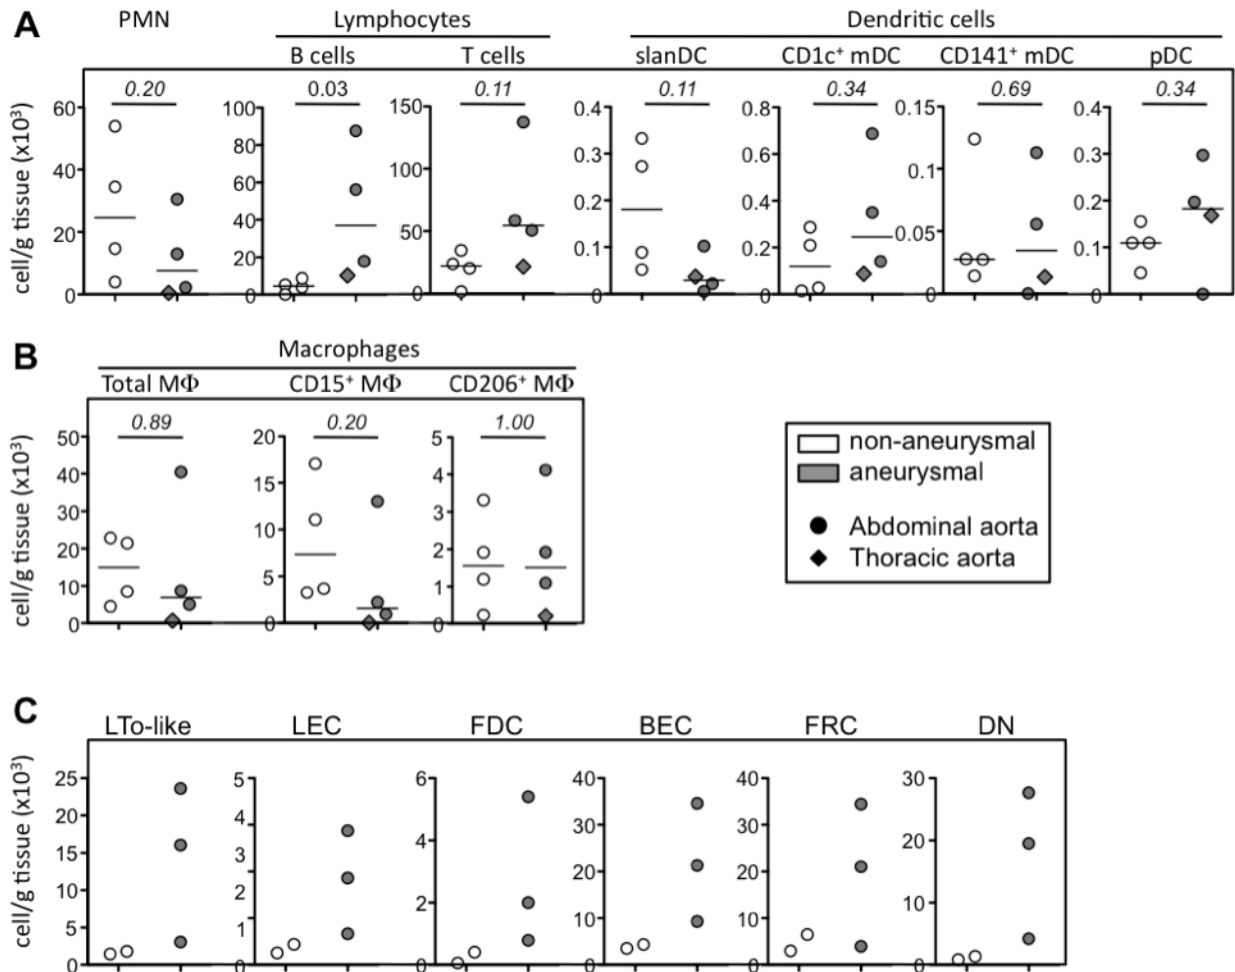

**Figure S1. Density of leukocyte and stromal cell subsets in the adventitia of aneurysmal and non-aneurysmal aortas**

Graphical representation of the density (cells / g tissue) of (A) PMN, lymphocyte, DC, (B) macrophage, and (C) stromal cell subsets in the adventitia from non-aneurysmal (white filled symbols, n=5) and aneurysmal (grey filled symbols, n=5) aortas. Circles correspond to abdominal aortas, and diamond to a thoracic aorta. p values were calculated with the Mann-Whitney nonparametric test.
