# Supplementary material for: Deciphering the Stromal and Hematopoietic Cell Network of the Adventitia from Non-Aneurysmal and Aneurysmal Human Aorta
Source: PubMed Central journal article supplement (PMC3937418; doi:10.1371/journal.pone.0089983), 2014-02-27
Supplement: pone.0089983.s003.pdf [file pone.0089983.s003.pdf]

**Table S1. Configuration of the BD FACS LSRII used in the present study.**

| Laser             | Band pass | Long pass | Leukocyte panel |                      | Stromal cell panel |                      |
|-------------------|-----------|-----------|-----------------|----------------------|--------------------|----------------------|
|                   |           |           | Target          | Fluorochrome         | Target             | Fluorochrome         |
| Violet<br>(405nm) | 790/20    | 770LP     | CD19            | Brilliant Violet 785 | CD44               | Brilliant Violet 785 |
|                   | 695/40    | 685LP     | CD3             | Brilliant Violet 711 |                    |                      |
|                   | 655/8     | 630LP     | CD123           | Brilliant Violet 650 |                    |                      |
|                   | 605/12    | 595LP     | CD14            | Brilliant Violet 605 | Dead cells         | Live/Dead Yellow     |
|                   | 550/40    | 530LP     | Dead cells      | Live/Dead Yellow     |                    |                      |
|                   | 500/30    | 495LP     | CD45            | V500                 |                    |                      |
|                   | 450/50    |           | CD163           | Vioblue              |                    |                      |
| Blue<br>(488nm)   | 780/60    | 755LP     | CD1c            | PE-Cy7               | CD21               | PE-Cy7               |
|                   | 720/40    | 700LP     | CD206           | PercP-eFluor710      | gp38               | PercP-eFluor710      |
|                   | 670/30    | 655LP     |                 |                      |                    |                      |
|                   | 610/20    | 600LP     | CD15            | PE-CF594             |                    |                      |
|                   | 575/26    | 550LP     | MerTK           | PE                   | ICAM1              | PE                   |
|                   | 530/30    | 505LP     | M-DC8           | FITC                 | VCAM1              | FITC                 |
|                   | 488/10    |           | SSC             |                      |                    |                      |
| Red<br>(633nm)    | 780/60    | 755LP     | HLA-DR          | APC-H7               | CD31               | APC-eFluor780        |
|                   | 720/40    | 700LP     | CD16            | Alexa700             | $\alpha$ SMA       | Alexa700             |
|                   | 660/20    |           | CD141           | APC                  | MadCAM1            | APC                  |
